# Supplementary material
Source: HighWire-hosted journal article supplement (https://bmjopen.bmj.com/content/10/8/e038936)
Supplement: inline-supplementary-material-2 [file inline-supplementary-material-2.pdf]

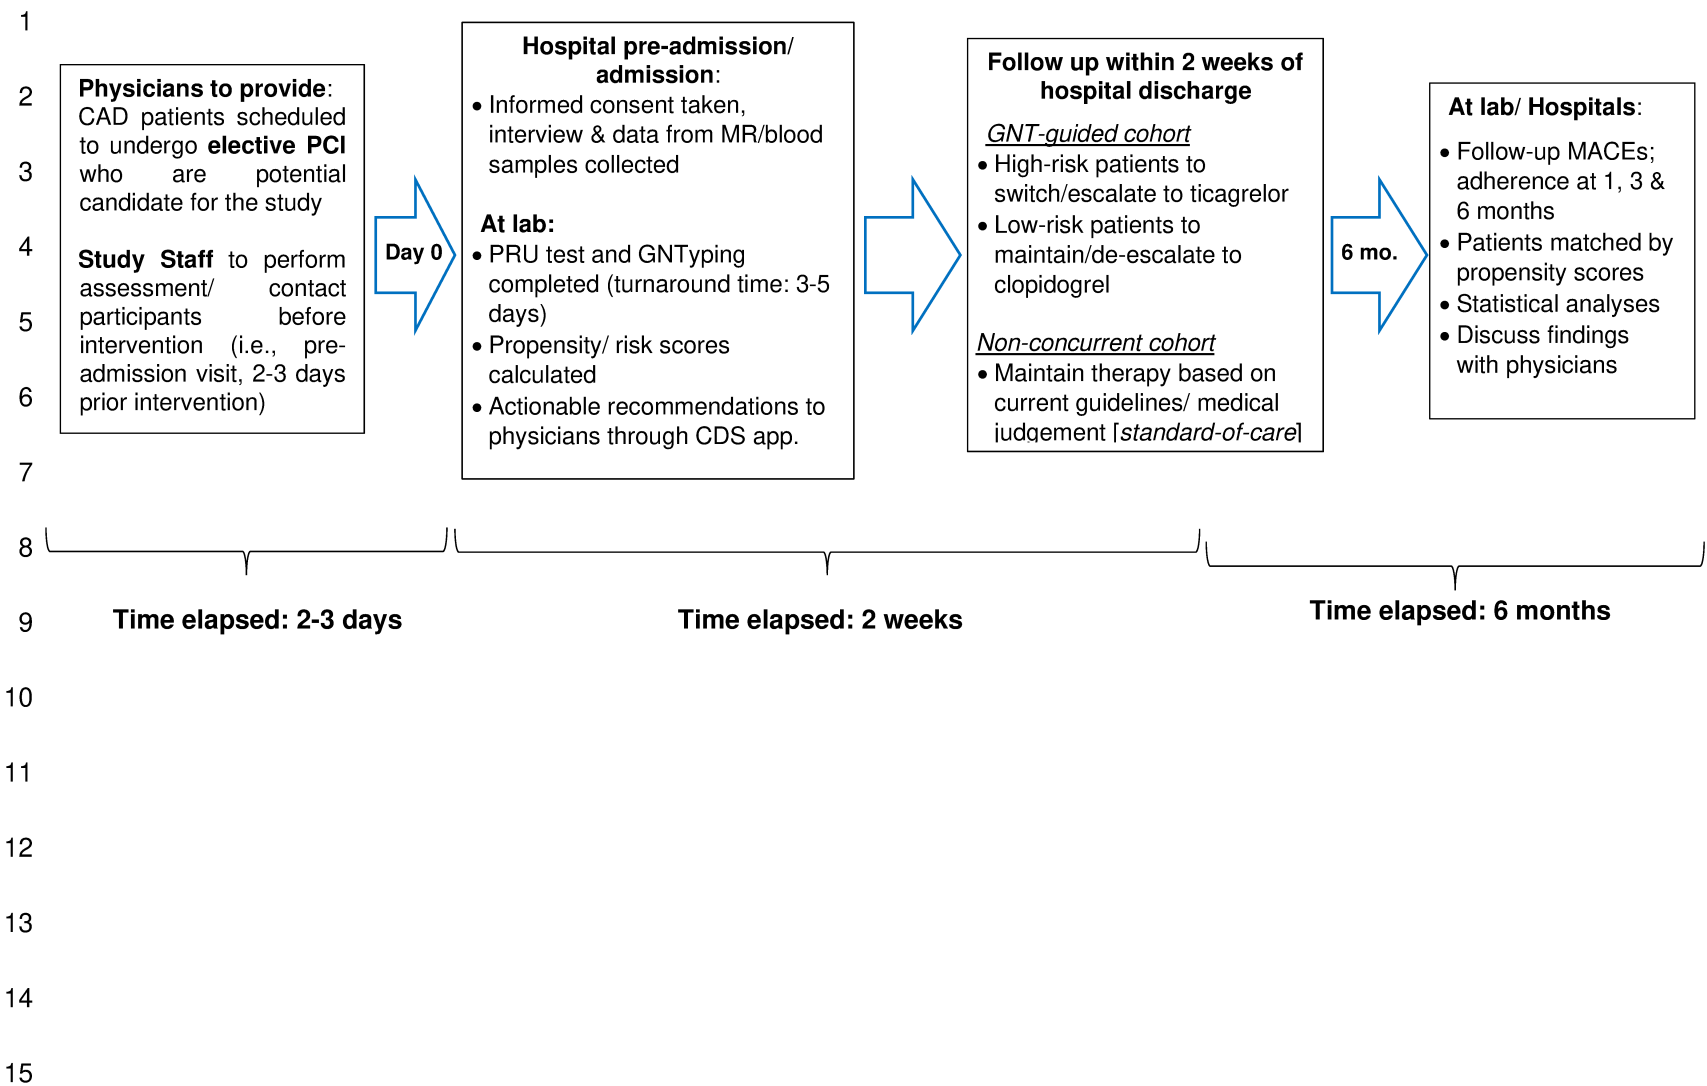

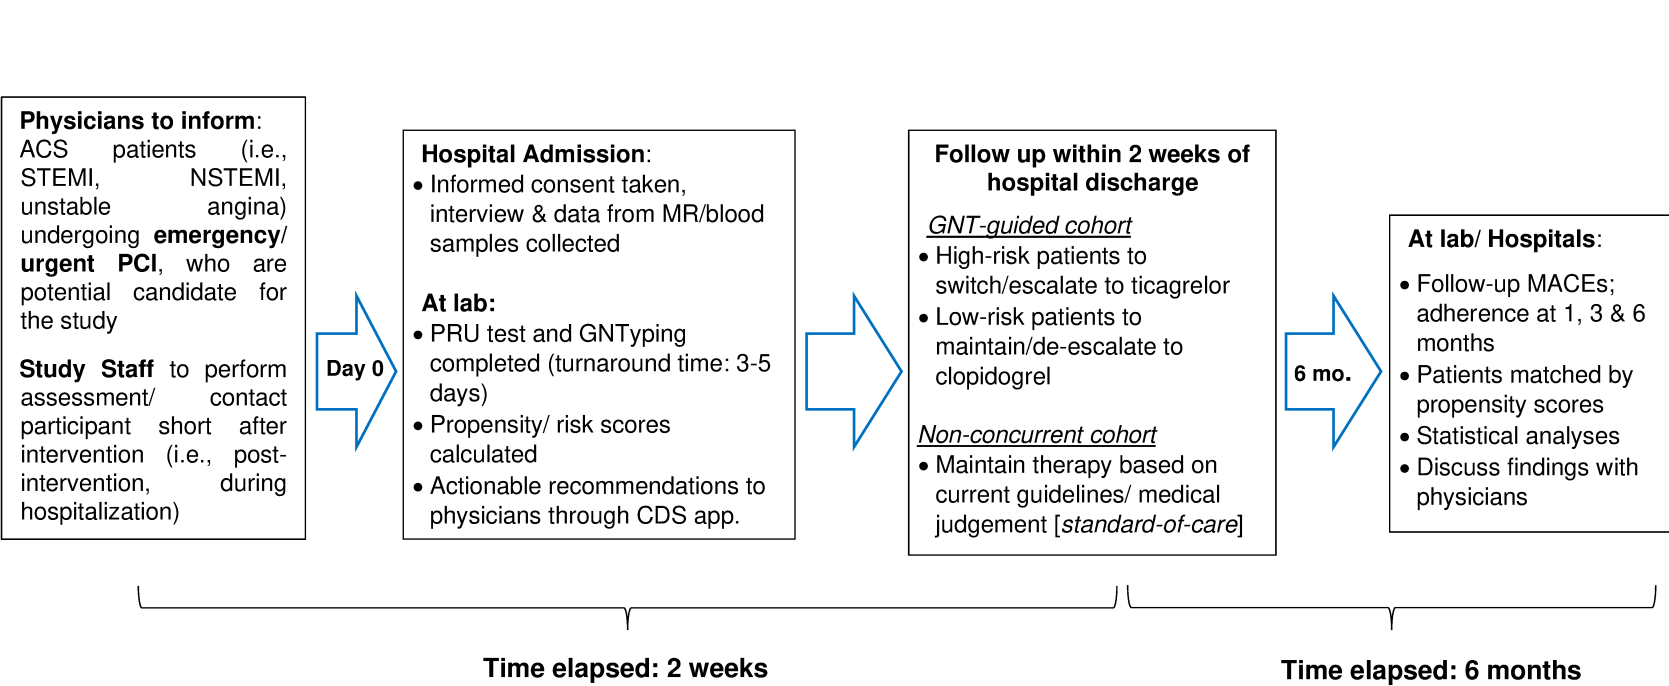

**Suppl. S2A-B.** Flowcharts of clinical protocol in CAD/ACS patients.

CAD: coronary artery disease; ACS: acute coronary syndrome; STEMI: ST-elevation myocardial infarction; NSTEMI: non-STEMI; PCI: percutaneous coronary intervention; MR: medical records; PRU: P2RY12 reaction units; GNT: genotypes; CDS: clinical decision-support tool; MACE: major adverse cardiovascular events.
